# Supplementary material for: Gut microbiota mediates cognitive impairment in young mice after multiple neonatal exposures to sevoflurane
Source: publisher site journal article supplement (doi:10.18632/aging.203193), 2021-06-28
Supplement: Supplementary file [file aging-v13i12-203193-supplementary-material-SD1.pdf]

## SUPPLEMENTARY FIGURE

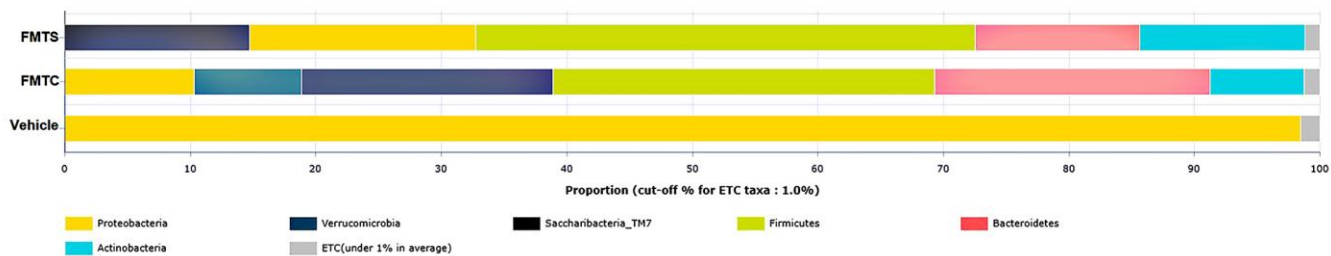

Supplementary Figure 1. Stacked histogram showing the relative abundance of bacterial community in the vehicle (pseudo germ-free), FMTC and FMTS mice. The taxa were shown at phylum level.
