# Supplementary material for: Gut microbiota mediates cognitive impairment in young mice after multiple neonatal exposures to sevoflurane
Source: Aging (Albany NY). 2021 Jun 28;13(12):16733–48. doi: 10.18632/aging.203193 (PMC8266337; doi:10.18632/aging.203193)
Supplement: Supplementary Table 1 [file aging-13-203193-s002.xls]

## Sheet: Biomarker_LEfSe
Supplementary Table 1. Differentiating bacterial taxa between sevoflurane and control identified by lefse.
Taxon name	Taxon rank	Taxonomy	LDA effect size	p-value	p-value (FDR)	anesthesia	control
PAC001141_s	Species	Bacteria: Firmicutes: Clostridia: Clostridiales: Christensenellaceae: PAC001141_g	2.91183	0.01052	0.01053	0.00000	0.16305
PAC001479_s	Species	Bacteria: Firmicutes: Clostridia: Clostridiales: Lachnospiraceae: Eubacterium_g17	2.56903	0.01273	0.01277	0.00024	0.07417
PAC001747_s	Species	Bacteria: Proteobacteria: Deltaproteobacteria: Desulfovibrionales: Desulfovibrionaceae: LT706945_g	3.12759	0.01273	0.01278	0.00024	0.26834
KB822463_s	Species	Bacteria: Firmicutes: Clostridia: Clostridiales: Lachnospiraceae: KE159605_g	2.84067	0.01390	0.01397	0.00089	0.13926
PAC001085_s	Species	Bacteria: Firmicutes: Clostridia: Clostridiales: Lachnospiraceae: Clostridium_g21	2.89821	0.01390	0.01398	0.00078	0.15879
PAC001182_s	Species	Bacteria: Firmicutes: Clostridia: Clostridiales: Ruminococcaceae: PAC000661_g	2.65566	0.01390	0.01398	0.00057	0.09088
Firmicutes	Phylum	Bacteria	4.66367	0.01431	0.01440	19.12800	28.34709
Tenericutes	Phylum	Bacteria	4.00858	0.01431	0.01440	3.45616	1.41645
Clostridia	Class	Bacteria: Firmicutes	4.81126	0.01431	0.01441	12.12613	25.07648
Mollicutes	Class	Bacteria: Tenericutes	4.00858	0.01431	0.01441	3.45616	1.41645
Clostridiales	Order	Bacteria: Firmicutes: Clostridia	4.81076	0.01431	0.01442	12.06517	25.00077
Mycoplasmatales	Order	Bacteria: Tenericutes: Mollicutes	4.00679	0.01431	0.01443	3.14012	1.10878
Enterococcaceae	Family	Bacteria: Firmicutes: Bacilli: Lactobacillales	2.70925	0.01431	0.01444	0.10904	0.00685
Mycoplasmataceae_f1	Family	Bacteria: Tenericutes: Mollicutes: Mycoplasmatales	4.00846	0.01431	0.01444	3.14012	1.10099
AC160630_f	Family	Bacteria: Bacteroidetes: Bacteroidia: Bacteroidales	3.57878	0.01431	0.01445	0.16092	0.91898
Enterococcus	Genus	Bacteria: Firmicutes: Bacilli: Lactobacillales: Enterococcaceae	2.70925	0.01431	0.01446	0.10904	0.00685
Frisingicoccus	Genus	Bacteria: Firmicutes: Clostridia: Clostridiales: Lachnospiraceae	2.29033	0.01431	0.01447	0.00528	0.04407
Pseudoflavonifractor	Genus	Bacteria: Firmicutes: Clostridia: Clostridiales: Ruminococcaceae	4.40699	0.01431	0.01447	1.04595	6.15099
Streptococcus	Genus	Bacteria: Firmicutes: Bacilli: Lactobacillales: Streptococcaceae	3.34484	0.01431	0.01448	0.46617	0.02392
LT706945_g	Genus	Bacteria: Proteobacteria: Deltaproteobacteria: Desulfovibrionales: Desulfovibrionaceae	3.11709	0.01431	0.01449	0.00947	0.27116
PAC000664_g	Genus	Bacteria: Firmicutes: Clostridia: Clostridiales: Lachnospiraceae	4.19193	0.01431	0.01450	0.57953	3.69079
PAC000671_g	Genus	Bacteria: Firmicutes: Clostridia: Clostridiales: Lachnospiraceae	3.05950	0.01431	0.01450	0.00284	0.23200
PAC001266_g	Genus	Bacteria: Actinobacteria: Coriobacteriia: Coriobacteriales: Coriobacteriaceae	4.13230	0.01431	0.01451	0.31114	3.02322
PAC002482_g	Genus	Bacteria: Bacteroidetes: Bacteroidia: Bacteroidales: AC160630_f	3.58140	0.01431	0.01451	0.14207	0.90470
Mycoplasmataceae_f1_uc	Genus	Bacteria: Tenericutes: Mollicutes: Mycoplasmatales: Mycoplasmataceae_f1	4.00920	0.01431	0.01452	3.14012	1.09752
Clostridium celatum group	Species	Bacteria: Firmicutes: Clostridia: Clostridiales: Clostridiaceae: Clostridium	2.07969	0.01431	0.01452	0.01633	0.04015
Enterococcus faecalis	Species	Bacteria: Firmicutes: Bacilli: Lactobacillales: Enterococcaceae: Enterococcus	2.66950	0.01431	0.01453	0.09979	0.00655
Lactobacillus helveticus group	Species	Bacteria: Firmicutes: Bacilli: Lactobacillales: Lactobacillaceae: Lactobacillus	3.92479	0.01431	0.01453	1.69260	0.01084
Streptococcus gallolyticus group	Species	Bacteria: Firmicutes: Bacilli: Lactobacillales: Streptococcaceae: Streptococcus	3.34713	0.01431	0.01454	0.44640	0.00181
DQ815763_s	Species	Bacteria: Bacteroidetes: Bacteroidia: Bacteroidales: Odoribacteraceae: Odoribacter	3.39238	0.01431	0.01454	0.19567	0.68911
EF602939_s	Species	Bacteria: Firmicutes: Clostridia: Clostridiales: Ruminococcaceae: Pseudoflavonifractor	2.15024	0.01431	0.01454	0.00351	0.03153
EF603735_s	Species	Bacteria: Bacteroidetes: Bacteroidia: Bacteroidales: AC160630_f: PAC002482_g	3.55849	0.01431	0.01455	0.13301	0.85645
HM124151_s	Species	Bacteria: Firmicutes: Clostridia: Clostridiales: Christensenellaceae: PAC001219_g	2.81004	0.01431	0.01457	0.01490	0.14382
PAC001075_s	Species	Bacteria: Bacteroidetes: Bacteroidia: Bacteroidales: Muribaculaceae: PAC000198_g	3.53798	0.01431	0.01457	0.02477	0.71483
PAC001077_s	Species	Bacteria: Bacteroidetes: Bacteroidia: Bacteroidales: Muribaculaceae: Muribaculum	3.12512	0.01431	0.01457	0.00357	0.27015
PAC001104_s	Species	Bacteria: Firmicutes: Clostridia: Clostridiales: Lachnospiraceae: PAC000664_g	4.10587	0.01431	0.01458	0.19346	2.74540
PAC001119_s	Species	Bacteria: Firmicutes: Clostridia: Clostridiales: Lachnospiraceae: Eubacterium_g17	2.06099	0.01431	0.01458	0.00202	0.02475
PAC001266_s	Species	Bacteria: Actinobacteria: Coriobacteriia: Coriobacteriales: Coriobacteriaceae: PAC001266_g	3.62334	0.01431	0.01459	0.06800	0.90797
PAC001357_s	Species	Bacteria: Actinobacteria: Coriobacteriia: Coriobacteriales: Coriobacteriaceae: PAC001266_g	3.46456	0.01431	0.01459	0.01601	0.59870
PAC001374_s	Species	Bacteria: Firmicutes: Clostridia: Clostridiales: Lachnospiraceae: Clostridium_g24	2.68664	0.01431	0.01459	0.00316	0.10014
PAC001381_s	Species	Bacteria: Firmicutes: Clostridia: Clostridiales: Lachnospiraceae: PAC001092_g	2.75081	0.01431	0.01460	0.00258	0.11503
PAC001473_s	Species	Bacteria: Firmicutes: Clostridia: Clostridiales: Lachnospiraceae: PAC000671_g	3.03772	0.01431	0.01461	0.00284	0.22077
PAC001508_s	Species	Bacteria: Firmicutes: Clostridia: Clostridiales: Ruminococcaceae: Paludicola	2.47867	0.01431	0.01461	0.06113	0.00115
PAC001574_s group	Species	Bacteria: Firmicutes: Clostridia: Clostridiales: Ruminococcaceae: Pseudoflavonifractor	3.51947	0.01431	0.01461	0.00706	0.66832
PAC001786_s	Species	Bacteria: Firmicutes: Clostridia: Clostridiales: Ruminococcaceae: Pseudoflavonifractor	2.69866	0.01431	0.01463	0.01907	0.11878
PAC002302_s	Species	Bacteria: Firmicutes: Clostridia: Clostridiales: Ruminococcaceae: Pseudoflavonifractor	3.91505	0.01431	0.01463	0.34015	1.98463
PAC002490_s	Species	Bacteria: Firmicutes: Clostridia: Clostridiales: Ruminococcaceae: Pseudoflavonifractor	3.92633	0.01431	0.01463	0.04470	1.73246
PAC000688_s	Species	Bacteria: Firmicutes: Clostridia: Clostridiales: Lachnospiraceae: Frisingicoccus	2.20977	0.02495	0.02556	0.00158	0.03377
PAC001547_s	Species	Bacteria: Firmicutes: Clostridia: Clostridiales: Ruminococcaceae: Pseudoflavonifractor	2.27828	0.02495	0.02556	0.00263	0.04039
PAC001768_s	Species	Bacteria: Firmicutes: Clostridia: Clostridiales: Ruminococcaceae: PAC000661_g	2.35418	0.02684	0.02754	0.00177	0.04676
PAC001472_g_uc	Species	Bacteria: Bacteroidetes: Bacteroidia: Bacteroidales: Muribaculaceae: PAC001472_g	3.22527	0.02684	0.02755	0.34404	0.00828
Actinobacteria	Phylum	Bacteria	4.20504	0.02749	0.02822	2.41879	5.62535
Deltaproteobacteria	Class	Bacteria: Proteobacteria	4.40627	0.02749	0.02823	3.61394	8.71053
Odoribacteraceae	Family	Bacteria: Bacteroidetes: Bacteroidia: Bacteroidales	4.37298	0.02749	0.02825	1.42833	6.14889
Ruminococcaceae	Family	Bacteria: Firmicutes: Clostridia: Clostridiales	4.64457	0.02749	0.02826	6.02626	14.84872
Desulfovibrio	Genus	Bacteria: Proteobacteria: Deltaproteobacteria	4.39622	0.02749	0.02827	2.86598	7.84596
Odoribacter	Genus	Bacteria: Bacteroidetes: Bacteroidia: Bacteroidales	4.37240	0.02749	0.02828	1.42064	6.13491
KE159797_g	Genus	Bacteria: Firmicutes: Clostridia: Clostridiales: Lachnospiraceae	3.13901	0.02749	0.02829	0.01598	0.29123
PAC001219_g	Genus	Bacteria: Firmicutes: Clostridia: Clostridiales: Christensenellaceae	2.84802	0.02749	0.02830	0.04363	0.18435
FJ879530_s	Species	Bacteria: Firmicutes: Clostridia: Clostridiales: Ruminococcaceae: Pseudoflavonifractor	2.73828	0.02749	0.02834	0.03513	0.14440
HQ740432_s	Species	Bacteria: Bacteroidetes: Bacteroidia: Bacteroidales: Odoribacteraceae: Odoribacter	3.97201	0.02749	0.02835	0.38559	2.26055
KI535319_s	Species	Bacteria: Firmicutes: Clostridia: Clostridiales: Ruminococcaceae: Pseudoflavonifractor	2.49976	0.02749	0.02836	0.01722	0.08020
PAC001069_s	Species	Bacteria: Bacteroidetes: Bacteroidia: Bacteroidales: Muribaculaceae: PAC001068_g	3.42492	0.02749	0.02837	0.07584	0.60769
PAC000197_f_uc	Genus	Bacteria: Tenericutes: Mollicutes: PAC001057_o: PAC000197_f	2.43684	0.02905	0.03001	0.05445	0.00000
FJ880744_s	Species	Bacteria: Firmicutes: Clostridia: Clostridiales: Lachnospiraceae: PAC001516_g	2.50996	0.02905	0.03005	0.06448	0.00000
EU474337_s	Species	Bacteria: Actinobacteria: Coriobacteriia: Coriobacteriales: Coriobacteriaceae: PAC001266_g	2.65003	0.03182	0.03311	0.00000	0.08914
PAC001528_s	Species	Bacteria: Firmicutes: Erysipelotrichi: Erysipelotrichales: Erysipelotrichaceae: PAC001528_g	2.63874	0.03182	0.03313	0.00000	0.08685
PAC002459_s group	Species	Bacteria: Firmicutes: Clostridia: Clostridiales: Lachnospiraceae: PAC000664_g	2.20313	0.03182	0.03315	0.00000	0.03172
