# Supplementary material for: Gut microbiota mediates cognitive impairment in young mice after multiple neonatal exposures to sevoflurane
Source: Aging (Albany NY). 2021 Jun 28;13(12):16733–48. doi: 10.18632/aging.203193 (PMC8266337; doi:10.18632/aging.203193)
Supplement: Supplementary Table 2 [file aging-13-203193-s003.xls]

## Sheet: Biomarker_LEfSe
Supplementary Table 2. Differentiating bacterial taxa between FMTS and FMTC identified by lefse.
Taxon name	Taxon rank	Taxonomy	LDA effect size	p-value	p-value (FDR)	FMTS	FMTC
AY442821_g	Genus	Bacteria: Firmicutes: Clostridia: Clostridiales: Christensenellaceae	2.44617	0.00000	0.00000	0.00037	0.05600
PAC002521_s	Species	Bacteria: Firmicutes: Clostridia: Clostridiales: Christensenellaceae: AY442821_g	2.44617	0.00000	0.00000	0.00037	0.05600
HM124337_s	Species	Bacteria: Firmicutes: Erysipelotrichi: Erysipelotrichales: Erysipelotrichaceae: PAC001528_g	2.08532	0.00000	0.00000	0.00018	0.02422
PAC001583_s	Species	Bacteria: Firmicutes: Clostridia: Clostridiales: Ruminococcaceae: PAC000661_g	2.14563	0.00001	0.00001	0.00018	0.02794
PAC001381_s	Species	Bacteria: Firmicutes: Clostridia: Clostridiales: Lachnospiraceae: PAC001092_g	2.69098	0.00001	0.00001	0.00207	0.10002
PAC001542_s	Species	Bacteria: Firmicutes: Clostridia: Clostridiales: Ruminococcaceae: Pseudoflavonifractor	2.12289	0.00003	0.00003	0.00000	0.02625
EU504499_s	Species	Bacteria: Bacteroidetes: Bacteroidia: Bacteroidales: Muribaculaceae: PAC001067_g	2.15319	0.00004	0.00004	0.00153	0.02973
Adlercreutzia	Genus	Bacteria: Actinobacteria: Coriobacteriia: Coriobacteriales: Coriobacteriaceae	3.50322	0.00005	0.00005	0.00665	0.64361
Adlercreutzia equolifaciens group	Species	Bacteria: Actinobacteria: Coriobacteriia: Coriobacteriales: Coriobacteriaceae: Adlercreutzia	3.50322	0.00005	0.00005	0.00665	0.64361
PAC002450_s	Species	Bacteria: Bacteroidetes: Bacteroidia: Bacteroidales: Muribaculaceae: PAC001068_g	2.02629	0.00005	0.00005	0.00045	0.02147
ASTB_g_uc	Species	Bacteria: Firmicutes: Erysipelotrichi: Erysipelotrichales: Erysipelotrichaceae: ASTB_g	3.64677	0.00007	0.00007	0.93673	0.05019
Muribaculum_uc	Species	Bacteria: Bacteroidetes: Bacteroidia: Bacteroidales: Muribaculaceae: Muribaculum	4.24473	0.00008	0.00009	0.52860	4.04208
PAC001614_s	Species	Bacteria: Firmicutes: Clostridia: Clostridiales: Ruminococcaceae: Acutalibacter	2.23516	0.00014	0.00014	0.03467	0.00054
Bacillales	Order	Bacteria: Firmicutes: Bacilli	2.19206	0.00015	0.00015	0.05319	0.02238
Allobaculum	Genus	Bacteria: Firmicutes: Erysipelotrichi: Erysipelotrichales: Erysipelotrichaceae	4.38138	0.00015	0.00016	5.50933	0.69663
PAC000681_s	Species	Bacteria: Firmicutes: Erysipelotrichi: Erysipelotrichales: Erysipelotrichaceae: Allobaculum	4.38106	0.00015	0.00016	5.50580	0.69663
PAC000197_g_uc	Species	Bacteria: Tenericutes: Mollicutes: PAC001057_o: PAC000197_f: PAC000197_g	2.10569	0.00016	0.00017	0.00481	0.02995
PAC002357_s	Species	Bacteria: Firmicutes: Clostridia: Clostridiales: Ruminococcaceae: Eubacterium_g8	2.13907	0.00017	0.00017	0.00050	0.02773
PAC002514_s group	Species	Bacteria: Firmicutes: Clostridia: Clostridiales: Ruminococcaceae: PAC000661_g	2.89196	0.00023	0.00023	0.20871	0.05296
PAC001468_g	Genus	Bacteria: Firmicutes: Clostridia: Clostridiales: Ruminococcaceae	3.29833	0.00024	0.00025	0.00329	0.40061
PAC001731_s	Species	Bacteria: Firmicutes: Clostridia: Clostridiales: Ruminococcaceae: PAC001468_g	3.29833	0.00024	0.00025	0.00329	0.40061
EU474337_s	Species	Bacteria: Actinobacteria: Coriobacteriia: Coriobacteriales: Coriobacteriaceae: PAC001266_g	2.50378	0.00024	0.00025	0.06448	0.00090
PAC001005_s	Species	Bacteria: Firmicutes: Clostridia: Clostridiales: Ruminococcaceae: PAC000683_g	2.61234	0.00025	0.00026	0.00283	0.08453
PAC002428_s	Species	Bacteria: Firmicutes: Clostridia: Clostridiales: Lachnospiraceae: KE159538_g	3.33501	0.00027	0.00027	0.43500	0.00264
FJ879881_s	Species	Bacteria: Firmicutes: Clostridia: Clostridiales: Ruminococcaceae: Ruminococcus	2.13002	0.00027	0.00027	0.00000	0.02672
Coriobacteriia	Class	Bacteria: Actinobacteria	4.37104	0.00033	0.00033	12.09308	7.39359
Coriobacteriales	Order	Bacteria: Actinobacteria: Coriobacteriia	4.37104	0.00033	0.00033	12.09308	7.39359
Coriobacteriaceae	Family	Bacteria: Actinobacteria: Coriobacteriia: Coriobacteriales	4.37104	0.00033	0.00034	12.09308	7.39359
PAC001452_g	Genus	Bacteria: Firmicutes: Clostridia: Clostridiales: Lachnospiraceae	2.84944	0.00033	0.00034	0.01496	0.15615
PAC001981_s group	Species	Bacteria: Firmicutes: Clostridia: Clostridiales: Lachnospiraceae: PAC001452_g	2.84944	0.00033	0.00034	0.01496	0.15615
PAC002459_s group	Species	Bacteria: Firmicutes: Clostridia: Clostridiales: Lachnospiraceae: PAC000664_g	2.70903	0.00033	0.00034	0.10520	0.00307
Actinobacteria	Phylum	Bacteria	4.44341	0.00040	0.00040	13.04128	7.48958
PAC001104_s	Species	Bacteria: Firmicutes: Clostridia: Clostridiales: Lachnospiraceae: PAC000664_g	3.27884	0.00040	0.00040	0.41801	0.03814
KE159797_s	Species	Bacteria: Firmicutes: Clostridia: Clostridiales: Lachnospiraceae: KE159797_g	2.42937	0.00048	0.00049	0.06162	0.00811
Actinobacteria_c	Class	Bacteria: Actinobacteria	3.62845	0.00048	0.00049	0.94416	0.09425
Bifidobacteriales	Order	Bacteria: Actinobacteria: Actinobacteria_c	3.62506	0.00057	0.00058	0.92590	0.08260
Bifidobacteriaceae	Family	Bacteria: Actinobacteria: Actinobacteria_c: Bifidobacteriales	3.62506	0.00057	0.00058	0.92590	0.08260
Bifidobacterium	Genus	Bacteria: Actinobacteria: Actinobacteria_c: Bifidobacteriales: Bifidobacteriaceae	3.62497	0.00057	0.00058	0.92572	0.08260
Bifidobacterium pseudolongum group	Species	Bacteria: Actinobacteria: Actinobacteria_c: Bifidobacteriales: Bifidobacteriaceae: Bifidobacterium	3.62464	0.00057	0.00058	0.92508	0.08260
Enterorhabdus muris	Species	Bacteria: Actinobacteria: Coriobacteriia: Coriobacteriales: Coriobacteriaceae: Enterorhabdus	3.63009	0.00081	0.00084	1.07506	0.22193
Lactobacillus gasseri group	Species	Bacteria: Firmicutes: Bacilli: Lactobacillales: Lactobacillaceae: Lactobacillus	4.31262	0.00081	0.00084	6.15345	2.04546
PAC001069_s	Species	Bacteria: Bacteroidetes: Bacteroidia: Bacteroidales: Muribaculaceae: PAC001068_g	3.00908	0.00081	0.00084	0.05698	0.26100
HM124212_s	Species	Bacteria: Firmicutes: Clostridia: Clostridiales: Ruminococcaceae: Ruminococcus	2.56027	0.00088	0.00090	0.07304	0.00058
Enterorhabdus	Genus	Bacteria: Actinobacteria: Coriobacteriia: Coriobacteriales: Coriobacteriaceae	3.95438	0.00097	0.00100	3.09317	1.29279
Muribaculum	Genus	Bacteria: Bacteroidetes: Bacteroidia: Bacteroidales: Muribaculaceae	4.20786	0.00097	0.00100	1.36270	4.59015
PAC002481_s	Species	Bacteria: Bacteroidetes: Bacteroidia: Bacteroidales: Prevotellaceae: Prevotella	2.23136	0.00099	0.00102	0.00032	0.03415
PAC001117_s	Species	Bacteria: Firmicutes: Clostridia: Clostridiales: Lachnospiraceae: PAC000664_g	2.53658	0.00104	0.00107	0.00345	0.07205
EU456594_g	Genus	Bacteria: Actinobacteria: Coriobacteriia: Coriobacteriales: Coriobacteriaceae	3.52973	0.00115	0.00119	0.87952	0.20245
EU456594_s	Species	Bacteria: Actinobacteria: Coriobacteriia: Coriobacteriales: Coriobacteriaceae: EU456594_g	3.52973	0.00115	0.00119	0.87952	0.20245
DQ456215_s	Species	Bacteria: Firmicutes: Clostridia: Clostridiales: Ruminococcaceae: PAC000661_g	2.26452	0.00131	0.00136	0.00077	0.03728
PAC002302_s	Species	Bacteria: Firmicutes: Clostridia: Clostridiales: Ruminococcaceae: Pseudoflavonifractor	3.10065	0.00136	0.00141	0.03671	0.28866
PAC000183_s	Species	Bacteria: Firmicutes: Clostridia: Clostridiales: Lachnospiraceae: Clostridium_g24	2.19509	0.00160	0.00166	0.02359	0.05472
Pseudomonadales	Order	Bacteria: Proteobacteria: Gammaproteobacteria	2.69698	0.00161	0.00167	0.15343	0.05411
PAC001188_s	Species	Bacteria: Firmicutes: Clostridia: Clostridiales: Ruminococcaceae: Oscillibacter	2.15135	0.00161	0.00167	0.04213	0.01399
PAC001554_s	Species	Bacteria: Firmicutes: Clostridia: Clostridiales: Lachnospiraceae: PAC001200_g	2.63263	0.00161	0.00167	0.13870	0.05312
PAC002348_s	Species	Bacteria: Firmicutes: Clostridia: Clostridiales: Lachnospiraceae: KE159571_g	2.38153	0.00184	0.00191	0.05241	0.00449
PAC001404_s	Species	Bacteria: Tenericutes: Mollicutes: PAC001057_o: PAC000197_f: PAC000197_g	2.19869	0.00189	0.00196	0.00041	0.03177
Pseudomonadaceae	Family	Bacteria: Proteobacteria: Gammaproteobacteria: Pseudomonadales	2.69288	0.00190	0.00197	0.15239	0.05400
Pseudomonas	Genus	Bacteria: Proteobacteria: Gammaproteobacteria: Pseudomonadales: Pseudomonadaceae	2.69288	0.00190	0.00197	0.15239	0.05400
PAC001122_s	Species	Bacteria: Firmicutes: Clostridia: Clostridiales: Ruminococcaceae: Ruminococcus	2.10730	0.00217	0.00227	0.00212	0.02745
PAC000664_g	Genus	Bacteria: Firmicutes: Clostridia: Clostridiales: Lachnospiraceae	3.51472	0.00223	0.00233	0.92504	0.27098
Lactobacillus reuteri group	Species	Bacteria: Firmicutes: Bacilli: Lactobacillales: Lactobacillaceae: Lactobacillus	3.68251	0.00223	0.00233	1.65507	0.69247
Pseudomonas fulva group	Species	Bacteria: Proteobacteria: Gammaproteobacteria: Pseudomonadales: Pseudomonadaceae: Pseudomonas	2.20985	0.00223	0.00233	0.04888	0.01671
PAC001679_g	Genus	Bacteria: Firmicutes: Clostridia: Clostridiales: Lachnospiraceae	2.81732	0.00255	0.00266	0.13615	0.00502
PAC001679_s	Species	Bacteria: Firmicutes: Clostridia: Clostridiales: Lachnospiraceae: PAC001679_g	2.81732	0.00255	0.00267	0.13615	0.00502
Pseudomonas veronii group	Species	Bacteria: Proteobacteria: Gammaproteobacteria: Pseudomonadales: Pseudomonadaceae: Pseudomonas	2.42273	0.00262	0.00275	0.08210	0.02939
EU622763_s	Species	Bacteria: Bacteroidetes: Bacteroidia: Bacteroidales: Prevotellaceae: Prevotella	2.91421	0.00262	0.00275	0.02248	0.18642
GQ448612_s	Species	Bacteria: Firmicutes: Clostridia: Clostridiales: Ruminococcaceae: PAC000683_g	2.60511	0.00283	0.00297	0.00058	0.08093
Betaproteobacteria	Class	Bacteria: Proteobacteria	2.20525	0.00308	0.00323	0.05420	0.02237
PAC001120_s	Species	Bacteria: Firmicutes: Clostridia: Clostridiales: Lachnospiraceae: KE159538_g	3.37743	0.00308	0.00323	0.48508	0.00834
PAC001068_s	Species	Bacteria: Bacteroidetes: Bacteroidia: Bacteroidales: Muribaculaceae: PAC001068_g	3.01137	0.00308	0.00323	0.10472	0.30980
PAC001112_s	Species	Bacteria: Bacteroidetes: Bacteroidia: Bacteroidales: Muribaculaceae: PAC001112_g	2.42185	0.00308	0.00323	0.02031	0.07289
KE159810_g	Genus	Bacteria: Firmicutes: Clostridia: Clostridiales: Lachnospiraceae	2.97160	0.00316	0.00333	0.00152	0.18866
KE159810_s	Species	Bacteria: Firmicutes: Clostridia: Clostridiales: Lachnospiraceae: KE159810_g	2.97160	0.00316	0.00333	0.00152	0.18866
PAC001515_s	Species	Bacteria: Firmicutes: Clostridia: Clostridiales: Lachnospiraceae: PAC000664_g	2.34651	0.00318	0.00335	0.04538	0.00117
PAC000687_g	Genus	Bacteria: Firmicutes: Erysipelotrichi: Erysipelotrichales: Erysipelotrichaceae	2.92604	0.00359	0.00379	0.18371	0.01523
PAC000687_s	Species	Bacteria: Firmicutes: Erysipelotrichi: Erysipelotrichales: Erysipelotrichaceae: PAC000687_g	2.92604	0.00359	0.00379	0.18371	0.01523
PAC002411_s	Species	Bacteria: Actinobacteria: Coriobacteriia: Coriobacteriales: Coriobacteriaceae: PAC001266_g	3.51789	0.00360	0.00380	1.15025	0.49140
DQ777929_s	Species	Bacteria: Firmicutes: Clostridia: Clostridiales: Lachnospiraceae: PAC001199_g	2.59837	0.00419	0.00444	0.09500	0.01590
PAC001762_g	Genus	Bacteria: Firmicutes: Erysipelotrichi: Erysipelotrichales: Erysipelotrichaceae	2.27357	0.00420	0.00445	0.01792	0.05525
EF096150_s	Species	Bacteria: Firmicutes: Erysipelotrichi: Erysipelotrichales: Erysipelotrichaceae: PAC001762_g	2.27741	0.00420	0.00445	0.01736	0.05502
PAC001212_g	Genus	Bacteria: Firmicutes: Clostridia: Clostridiales: Lachnospiraceae	2.41176	0.00466	0.00495	0.00532	0.05673
Caulobacterales	Order	Bacteria: Proteobacteria: Alphaproteobacteria	2.24264	0.00489	0.00520	0.06347	0.02873
Caulobacteraceae	Family	Bacteria: Proteobacteria: Alphaproteobacteria: Caulobacterales	2.24264	0.00489	0.00520	0.06347	0.02873
Faecalibaculum rodentium	Species	Bacteria: Firmicutes: Erysipelotrichi: Erysipelotrichales: Erysipelotrichaceae: Faecalibaculum	2.87368	0.00489	0.00520	0.19934	0.05002
Prevotella	Genus	Bacteria: Bacteroidetes: Bacteroidia: Bacteroidales	2.99016	0.00489	0.00521	0.03486	0.23018
PAC001200_g_uc	Species	Bacteria: Firmicutes: Clostridia: Clostridiales: Lachnospiraceae: PAC001200_g	2.58390	0.00563	0.00603	0.00120	0.07769
AB185622_s	Species	Bacteria: Firmicutes: Clostridia: Clostridiales: Ruminococcaceae: PAC000661_g	3.42294	0.00568	0.00608	0.62679	0.09736
PAC001199_s	Species	Bacteria: Firmicutes: Clostridia: Clostridiales: Lachnospiraceae: PAC001199_g	2.09867	0.00570	0.00612	0.00012	0.02490
Streptococcus danieliae	Species	Bacteria: Firmicutes: Bacilli: Lactobacillales: Streptococcaceae: Streptococcus	2.39300	0.00658	0.00708	0.07558	0.02636
Paraprevotella	Genus	Bacteria: Bacteroidetes: Bacteroidia: Bacteroidales: Prevotellaceae	2.58505	0.00743	0.00800	0.00328	0.08001
PAC000215_s	Species	Bacteria: Bacteroidetes: Bacteroidia: Bacteroidales: Prevotellaceae: Paraprevotella	2.58505	0.00743	0.00801	0.00328	0.08001
Erysipelotrichi	Class	Bacteria: Firmicutes	4.30257	0.00761	0.00821	8.32574	4.31169
Streptococcaceae	Family	Bacteria: Firmicutes: Bacilli: Lactobacillales	2.71803	0.00878	0.00952	0.20748	0.10320
PAC001072_s	Species	Bacteria: Bacteroidetes: Bacteroidia: Bacteroidales: Muribaculaceae: PAC001068_g	3.58732	0.00878	0.00953	0.40842	1.18152
PAC001366_s	Species	Bacteria: Firmicutes: Clostridia: Clostridiales: Lachnospiraceae: PAC001165_g	2.11318	0.00878	0.00953	0.04007	0.01432
EU504031_s	Species	Bacteria: Bacteroidetes: Bacteroidia: Bacteroidales: Muribaculaceae: PAC001472_g	2.70374	0.00932	0.01013	0.11052	0.00965
Muribaculaceae_uc	Genus	Bacteria: Bacteroidetes: Bacteroidia: Bacteroidales: Muribaculaceae	2.94446	0.00989	0.01079	0.02189	0.19768
PAC002441_s	Species	Bacteria: Bacteroidetes: Bacteroidia: Bacteroidales: Muribaculaceae: PAC001112_g	2.57522	0.01007	0.01100	0.04850	0.12348
PAC001079_s	Species	Bacteria: Proteobacteria: Deltaproteobacteria: Desulfovibrionales: Desulfovibrionaceae: Desulfovibrio	4.64338	0.01011	0.01106	16.17934	7.38094
PAC001528_s	Species	Bacteria: Firmicutes: Erysipelotrichi: Erysipelotrichales: Erysipelotrichaceae: PAC001528_g	2.35594	0.01092	0.01196	0.07016	0.02499
Parvibacter	Genus	Bacteria: Actinobacteria: Coriobacteriia: Coriobacteriales: Coriobacteriaceae	2.95582	0.01162	0.01277	0.23520	0.05474
Streptococcus	Genus	Bacteria: Firmicutes: Bacilli: Lactobacillales: Streptococcaceae	2.56233	0.01162	0.01278	0.13133	0.05855
Parvibacter caecicola	Species	Bacteria: Actinobacteria: Coriobacteriia: Coriobacteriales: Coriobacteriaceae: Parvibacter	2.95582	0.01162	0.01278	0.23520	0.05474
PAC001184_s	Species	Bacteria: Firmicutes: Clostridia: Clostridiales: Ruminococcaceae: Neglecta	2.74692	0.01162	0.01279	0.04154	0.15300
PAC002449_s	Species	Bacteria: Bacteroidetes: Bacteroidia: Bacteroidales: Muribaculaceae: PAC001068_g	4.00976	0.01162	0.01279	0.44134	2.48661
PAC002490_s	Species	Bacteria: Firmicutes: Clostridia: Clostridiales: Ruminococcaceae: Pseudoflavonifractor	2.84279	0.01162	0.01280	0.11449	0.25354
Brevundimonas	Genus	Bacteria: Proteobacteria: Alphaproteobacteria: Caulobacterales: Caulobacteraceae	2.14040	0.01333	0.01473	0.05286	0.02547
PAC001062_g	Genus	Bacteria: Bacteroidetes: Bacteroidia: Bacteroidales: Muribaculaceae	2.66508	0.01333	0.01474	0.12897	0.03668
PAC001062_s	Species	Bacteria: Bacteroidetes: Bacteroidia: Bacteroidales: Muribaculaceae: PAC001062_g	2.66508	0.01333	0.01475	0.12897	0.03668
PAC001372_g	Genus	Bacteria: Firmicutes: Clostridia: Clostridiales: Lachnospiraceae	2.90610	0.01525	0.01692	0.17659	0.01568
PAC001573_g	Genus	Bacteria: Firmicutes: Clostridia: Clostridiales: Mogibacterium_f	2.35629	0.01525	0.01693	0.08886	0.04368
PAC001048_s group	Species	Bacteria: Firmicutes: Clostridia: Clostridiales: Ruminococcaceae: PAC000672_g	2.01499	0.01604	0.01785	0.02067	0.00034
PAC001202_s	Species	Bacteria: Firmicutes: Clostridia: Clostridiales: Ruminococcaceae: PAC000661_g	2.24477	0.01682	0.01875	0.00593	0.04085
Bacteroidaceae	Family	Bacteria: Bacteroidetes: Bacteroidia: Bacteroidales	2.71834	0.01742	0.01946	0.09345	0.19781
Bacteroides	Genus	Bacteria: Bacteroidetes: Bacteroidia: Bacteroidales: Bacteroidaceae	2.71834	0.01742	0.01947	0.09345	0.19781
Clostridium	Genus	Bacteria: Firmicutes: Clostridia: Clostridiales: Clostridiaceae	3.01786	0.01742	0.01947	0.33157	0.12337
Kineothrix	Genus	Bacteria: Firmicutes: Clostridia: Clostridiales: Lachnospiraceae	2.44454	0.01742	0.01948	0.00950	0.06494
LT821227_g	Genus	Bacteria: Actinobacteria: Coriobacteriia: Coriobacteriales: Coriobacteriaceae	3.43346	0.01742	0.01949	1.14130	0.59888
PAC000197_g	Genus	Bacteria: Tenericutes: Mollicutes: PAC001057_o: PAC000197_f	2.70505	0.01742	0.01950	0.12198	0.22319
PAC001125_s	Species	Bacteria: Firmicutes: Clostridia: Clostridiales: Lachnospiraceae: Kineothrix	2.44662	0.01742	0.01951	0.00924	0.06494
PAC001394_s	Species	Bacteria: Actinobacteria: Coriobacteriia: Coriobacteriales: Coriobacteriaceae: LT821227_g	3.43346	0.01742	0.01952	1.14130	0.59888
PAC001786_s	Species	Bacteria: Firmicutes: Clostridia: Clostridiales: Ruminococcaceae: Pseudoflavonifractor	2.53670	0.01742	0.01953	0.02577	0.09438
PAC002419_s	Species	Bacteria: Actinobacteria: Coriobacteriia: Coriobacteriales: Coriobacteriaceae: PAC001266_g	2.54012	0.01742	0.01954	0.05004	0.11918
AB626901_s	Species	Bacteria: Tenericutes: Mollicutes: PAC001057_o: PAC001057_f: PAC001109_g	2.59965	0.01818	0.02042	0.01082	0.09017
JRPE_s	Species	Bacteria: Proteobacteria: Epsilonproteobacteria: Campylobacterales: Helicobacteraceae: Helicobacter	2.23287	0.01821	0.02046	0.03377	0.06776
PAC001105_g	Genus	Bacteria: Firmicutes: Clostridia: Clostridiales: Lachnospiraceae	2.17264	0.01903	0.02141	0.02987	0.00032
PAC001105_s	Species	Bacteria: Firmicutes: Clostridia: Clostridiales: Lachnospiraceae: PAC001105_g	2.17264	0.01903	0.02142	0.02987	0.00032
PAC001472_g_uc	Species	Bacteria: Bacteroidetes: Bacteroidia: Bacteroidales: Muribaculaceae: PAC001472_g	2.29370	0.01947	0.02195	0.02760	0.06672
Proteobacteria	Phylum	Bacteria	4.63561	0.01985	0.02238	18.90202	10.25965
KE159797_g	Genus	Bacteria: Firmicutes: Clostridia: Clostridiales: Lachnospiraceae	2.82528	0.01985	0.02240	0.30181	0.16826
Bacteroides acidifaciens	Species	Bacteria: Bacteroidetes: Bacteroidia: Bacteroidales: Bacteroidaceae: Bacteroides	2.64331	0.01985	0.02241	0.04290	0.13067
KE159605_s	Species	Bacteria: Firmicutes: Clostridia: Clostridiales: Lachnospiraceae: KE159605_g	3.01231	0.01985	0.02242	0.10786	0.31341
PAC001809_s	Species	Bacteria: Firmicutes: Clostridia: Clostridiales: Lachnospiraceae: PAC001212_g	2.37755	0.02014	0.02289	0.00429	0.05179
DQ394665_s	Species	Bacteria: Firmicutes: Clostridia: Clostridiales: Ruminococcaceae: PAC000661_g	2.01553	0.02215	0.02521	0.09083	0.11136
Neglecta	Genus	Bacteria: Firmicutes: Clostridia: Clostridiales: Ruminococcaceae	2.74039	0.02256	0.02575	0.04348	0.15327
PAC001109_g	Genus	Bacteria: Tenericutes: Mollicutes: PAC001057_o: PAC001057_f	2.94775	0.02256	0.02578	0.06715	0.24428
Alistipes inops	Species	Bacteria: Bacteroidetes: Bacteroidia: Bacteroidales: Rikenellaceae: Alistipes	3.10051	0.02256	0.02580	0.09812	0.34999
PAC001710_s	Species	Bacteria: Firmicutes: Clostridia: Clostridiales: Lachnospiraceae: PAC001092_g	2.21004	0.02376	0.02723	0.03394	0.00173
HM124188_s	Species	Bacteria: Bacteroidetes: Bacteroidia: Bacteroidales: Muribaculaceae: PAC000198_g	2.49050	0.02560	0.02939	0.10209	0.16377
PAC001095_s	Species	Bacteria: Firmicutes: Clostridia: Clostridiales: Ruminococcaceae: PAC000661_g	3.26289	0.02560	0.02941	0.76193	1.12810
Deltaproteobacteria	Class	Bacteria: Proteobacteria	4.63021	0.02560	0.02942	18.18911	9.65357
Desulfovibrionales	Order	Bacteria: Proteobacteria: Deltaproteobacteria	4.63017	0.02560	0.02943	18.18758	9.65292
Desulfovibrionaceae	Family	Bacteria: Proteobacteria: Deltaproteobacteria: Desulfovibrionales	4.63017	0.02560	0.02945	18.18758	9.65292
Enterorhabdus caecimuris	Species	Bacteria: Actinobacteria: Coriobacteriia: Coriobacteriales: Coriobacteriaceae: Enterorhabdus	3.21046	0.02560	0.02946	0.77868	0.45417
PAC001456_g	Genus	Bacteria: Firmicutes: Clostridia: Clostridiales: Lachnospiraceae	2.15469	0.02609	0.03008	0.00410	0.03243
PAC001456_s	Species	Bacteria: Firmicutes: Clostridia: Clostridiales: Lachnospiraceae: PAC001456_g	2.15469	0.02609	0.03009	0.00410	0.03243
PAC001116_s	Species	Bacteria: Firmicutes: Clostridia: Clostridiales: Lachnospiraceae: PAC001116_g	2.77687	0.02899	0.03386	0.03949	0.15892
Desulfovibrio	Genus	Bacteria: Proteobacteria: Deltaproteobacteria	4.63011	0.02899	0.03388	18.03265	9.49910
PAC001535_s group	Species	Bacteria: Firmicutes: Clostridia: Clostridiales: Lachnospiraceae: PAC000664_g	2.97909	0.02899	0.03390	0.32173	0.13133
EU842956_s	Species	Bacteria: Firmicutes: Clostridia: Clostridiales: Ruminococcaceae: PAC000661_g	2.17594	0.03054	0.03582	0.00488	0.03459
PAC001268_s	Species	Bacteria: Cyanobacteria: Vampirovibrio_c: FR888536_o: FR888536_f: FR888536_g	2.27828	0.03064	0.03598	0.00857	0.04626
PAC001116_g	Genus	Bacteria: Firmicutes: Clostridia: Clostridiales: Lachnospiraceae	2.79167	0.03275	0.03867	0.04076	0.16434
PAC001074_s	Species	Bacteria: Bacteroidetes: Bacteroidia: Bacteroidales: Muribaculaceae: PAC001074_g	2.84720	0.03275	0.03869	0.09155	0.23202
PAC002474_s	Species	Bacteria: Firmicutes: Clostridia: Clostridiales: Ruminococcaceae: Pseudoflavonifractor	2.75281	0.03475	0.04112	0.01405	0.12703
Christensenellaceae	Family	Bacteria: Firmicutes: Clostridia: Clostridiales	2.51038	0.03692	0.04373	0.09956	0.16411
PAC000197_f	Family	Bacteria: Tenericutes: Mollicutes: PAC001057_o	2.67547	0.03692	0.04375	0.14878	0.24331
PAC001090_g	Genus	Bacteria: Firmicutes: Clostridia: Clostridiales: Lachnospiraceae	3.03096	0.03692	0.04377	0.28915	0.07457
PAC001090_s	Species	Bacteria: Firmicutes: Clostridia: Clostridiales: Lachnospiraceae: PAC001090_g	3.03096	0.03692	0.04380	0.28915	0.07457
PAC001222_s	Species	Bacteria: Firmicutes: Clostridia: Clostridiales: Lachnospiraceae: KE159797_g	2.59827	0.03692	0.04382	0.23477	0.15567
Enterorhabdus_uc	Species	Bacteria: Actinobacteria: Coriobacteriia: Coriobacteriales: Coriobacteriaceae: Enterorhabdus	2.78115	0.03692	0.04384	0.07003	0.19067
PAC002469_s	Species	Bacteria: Firmicutes: Clostridia: Clostridiales: Lachnospiraceae: LLKB_g	2.02303	0.03951	0.04699	0.02301	0.00216
PAC002553_s	Species	Bacteria: Tenericutes: Mollicutes: PAC001057_o: PAC001057_f: PAC001108_g	2.46803	0.04126	0.04953	0.05855	0.00000
PAC001193_s	Species	Bacteria: Tenericutes: Mollicutes: PAC001057_o: PAC001057_f: PAC001108_g	2.35366	0.04133	0.04969	0.06100	0.01608
Clostridiaceae	Family	Bacteria: Firmicutes: Clostridia: Clostridiales	3.02539	0.04154	0.04996	0.34447	0.13263
Porphyromonadaceae	Family	Bacteria: Bacteroidetes: Bacteroidia: Bacteroidales	2.92790	0.04154	0.04999	0.17499	0.34420
Parabacteroides	Genus	Bacteria: Bacteroidetes: Bacteroidia: Bacteroidales: Porphyromonadaceae	2.92790	0.04154	0.05002	0.17499	0.34420
FCNB_g	Genus	Bacteria: Actinobacteria: Coriobacteriia: Coriobacteriales: Coriobacteriaceae	2.64479	0.04154	0.05004	0.20595	0.11787
KE159605_g	Genus	Bacteria: Firmicutes: Clostridia: Clostridiales: Lachnospiraceae	3.20282	0.04154	0.05007	0.13660	0.45544
PAC001372_s	Species	Bacteria: Firmicutes: Clostridia: Clostridiales: Lachnospiraceae: PAC001372_g	2.89093	0.04154	0.05009	0.17040	0.01502
PAC002389_s	Species	Bacteria: Actinobacteria: Coriobacteriia: Coriobacteriales: Coriobacteriaceae: FCNB_g	2.64479	0.04154	0.05012	0.20595	0.11787
PAC001074_g	Genus	Bacteria: Bacteroidetes: Bacteroidia: Bacteroidales: Muribaculaceae	2.86814	0.04664	0.05645	0.10892	0.25634
